# Supplementary material
Source: publisher figshare collection journal article supplement (https://sage.figshare.com/ndownloader/files/14464469)
Supplement: Supplementary file 1 [file 14464469]

**Locations where declawing is illegal or very strongly regulated**

- Australia
- Austria
- Belgium
- Bosnia
- Brazil
- Denmark
- England
- Finland
- France
- Germany
- Ireland
- Israel
- Italy
- Macedonia
- Malta
- Montenegro
- Netherlands
- New Zealand
- Northern Ireland
- Norway
- Portugal
- Scotland
- Serbia
- Slovenia
- Sweden
- Switzerland
- Wales

Additionally, Denver, Colo., and seven California cities, including Los Angeles and San Francisco, have outlawed declawing of cats. Four states (Massachusetts, Rhode Island, California, and New York) have passed law preventing landlords from requiring tenants’ cats be declawed as a condition of tenancy.

Four other states (New York, New Jersey, Rhode Island, West Virgina) have pending legislation to ban the procedure.

*(Source: The Paw Project.“Animal Welfare Legislation.” 2018.)*
